# Supplementary material for: Population-specific association of Clock gene polymorphism with annual cycle timing in stonechats
Source: PubMed Central journal article supplement (PMC9106710; doi:10.1038/s41598-022-11158-z), 2022-05-13
Supplement: 41598_2022_11158_MOESM1_ESM.pdf [file 41598_2022_11158_MOESM1_ESM.pdf]

## Supplementary Material

### Population-specific association of *Clock* gene polymorphism with annual cycle timing in stonechats

Hannah Justen\*<sup>1,2</sup>, Timo Hasselmann<sup>1,3</sup>, Juan Carlos Illera<sup>4</sup>, Kira Delmore<sup>1,2</sup>, David Serrano<sup>5</sup>, Heiner Flinks<sup>6</sup>, Masayuki Senzaki<sup>7</sup>, Kazuhiro Kawamura<sup>8,9</sup>,  
Barbara Helm<sup>10,11</sup> and Miriam Liedvogel\*<sup>1,12</sup>

<sup>1</sup>MPRG Behavioural Genomics, Max Planck Institute for Evolutionary Biology, 24306 Plön, Germany; <sup>2</sup> Department of Biology, Texas A&M University, 3258 TAMU, College Station, TX, 77843, US; <sup>3</sup> Department of Animal Physiology, University of Cologne, Cologne, Germany; <sup>4</sup> Biodiversity Research Institute (CSIC-Oviedo University-Principality of Asturias), Oviedo University, Oviedo, Spain; <sup>5</sup> Department of Conservation Biology; Estación Biológica de Doñana (EBD-CSIC); Avda Américo Vespucio 26; 41092 Sevilla, Spain; <sup>6</sup> Wagnerstr. 19, D-46354 Suedlohn, Germany; <sup>7</sup> Environmental Earth Science, Hokkaido University, Sapporo, Hokkaido, Japan; <sup>8</sup> Graduate School of Agriculture, Hokkaido University, Kitaku Kita 9 Nishi 9, Sapporo, Hokkaido, Japan; <sup>9</sup> Department of Wildlife Biology, Forestry and Forest Products Research Institute, Matsunosato 1, Tsukuba, Ibaraki 305-8687, Japan; <sup>10</sup> Department of Bird Migration, Swiss Ornithological Institute, Seerose 1, 6204, Sempach, Switzerland; <sup>11</sup> Institute of Biodiversity, Animal Health and Comparative Medicine, University of Glasgow, Glasgow, UK; <sup>12</sup> Institute of Avian Research 'Vogelwarte Helgoland', 26386, Wilhelmshaven, Germany

**Table S1.** Breeding latitude, migration distance [km], *Ctk* poly-Q repeat length frequencies (Q<sub>8-15</sub>) and gene diversity (GD) of nine stonechat (*Saxicola spp.*) populations listed by increasing latitude. Gene diversity was calculated with a subset of the data including 518 birds captured in the wild (i.e. excluding captive-bred individuals).

---

| Populations | n   | Latitude | Distance | Q8    | Q9    | Q10   | Q11   | Q12   | Q13   | Q14   | Q15   | GD    |
|-------------|-----|----------|----------|-------|-------|-------|-------|-------|-------|-------|-------|-------|
| Kenya       | 95  | 0°14'S   | 0        | 0     | 0.005 | 0     | 0.089 | 0.032 | 0.858 | 0.016 | 0     | 0.256 |
| Tanzania    | 44  | 3°5'S    | 0        | 0     | 0.011 | 0.023 | 0.045 | 0.023 | 0.864 | 0.034 | 0     | 0.253 |
| Canary      | 61  | 28°46'N  | 0        | 0     | 0     | 0     | 0.008 | 0     | 0.008 | 0.984 | 0     | 0.033 |
| Spain       | 93  | 37°39'N  | 0        | 0.089 | 0     | 0     | 0.258 | 0     | 0.21  | 0.511 | 0     | 0.631 |
| Japan       | 11  | 43.6°N   | 4900     | 0.032 | 0     | 0     | 0.273 | 0     | 0.546 | 0.182 | 0     | 0.609 |
| Austria     | 64  | 48°14'N  | 1700     | 0.023 | 0     | 0     | 0.164 | 0.016 | 0.156 | 0.641 | 0     | 0.541 |
| Germany     | 47  | 51°47'N  | 1700     | 0.011 | 0.021 | 0     | 0.160 | 0.021 | 0.213 | 0.564 | 0.011 | 0.617 |
| Kazakhstan  | 60  | 51.5°N   | 2600     | 0     | 0     | 0.017 | 0.208 | 0     | 0.583 | 0.050 | 0.142 | 0.597 |
| Ireland     | 106 | 52°N     | 1200     | 0     | 0.005 | 0     | 0.104 | 0.038 | 0.462 | 0.392 | 0     | 0.623 |

---

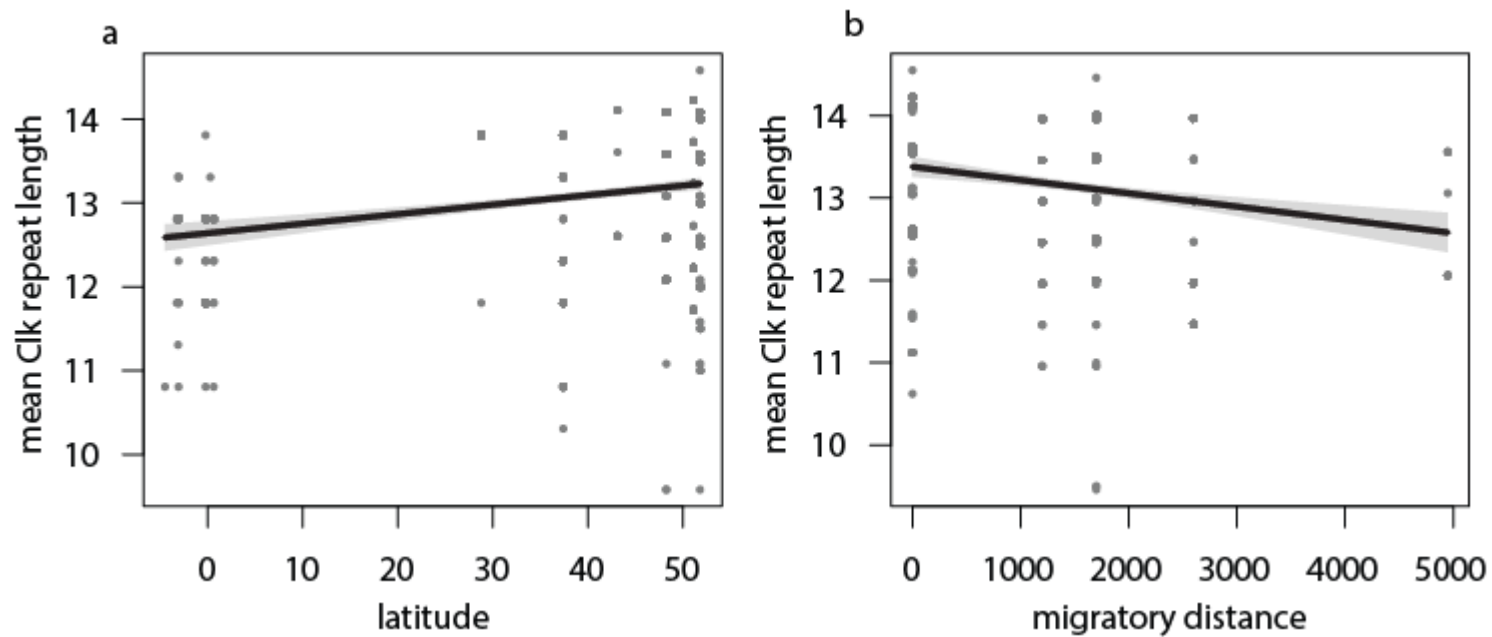

**Figure S1.** Results from linear model investigating breeding latitude (a) and migratory distance (b) of nine stonechat populations in relationship to *Clk* gene mean repeat length (including origin as a random effect). The model shows that mean repeat length of individuals increases at higher latitudes and decreases with longer migratory distance ( $p < 0.05$ ).
